# Supplementary material for: Sensing Cytosolic DNA Lowers Blood Pressure by Direct cGAMP-Dependent PKGI Activation
Source: PubMed Central journal article supplement (PMC10516174; doi:10.1161/circulationaha.123.065547), 2023-08-07

# Full unedited blots for Figure 1

**A**

|            | 20min |   |   |   | 1h |   |   |   |
|------------|-------|---|---|---|----|---|---|---|
| 50μM cGAMP | -     | + | - | - | -  | + | - | - |
| 50μM cGMP  | -     | - | + | - | -  | - | + | - |
| 50μM cAMP  | -     | - | - | + | -  | - | - | + |

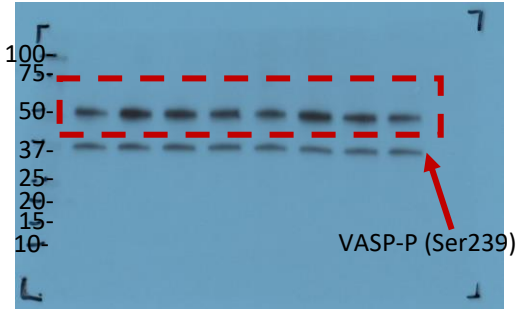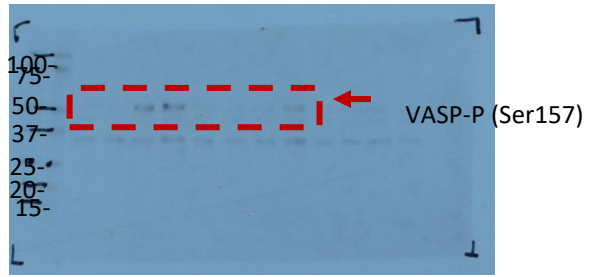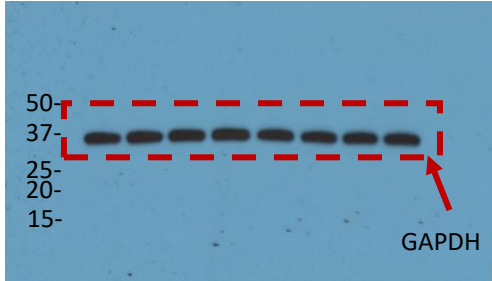

**B**

|                  |   |   |   |   |
|------------------|---|---|---|---|
| 50μM cGAMP       | - | - | + | + |
| 50μM Rp-Br-cGMPs | - | + | - | + |

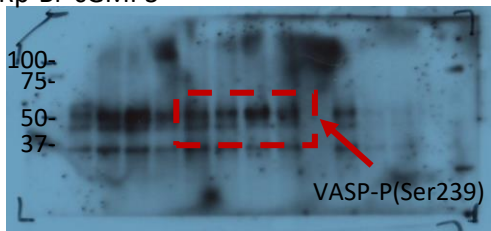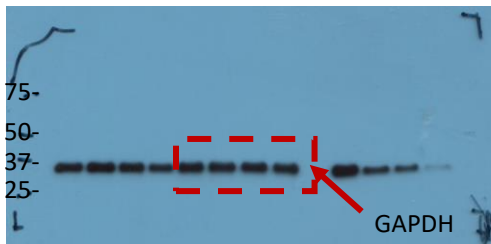

**C**

| cGAS DNA (ng) | ○ | ○ | 100 | 100 | 500 | 500 | ○ | ○ | 100 | 100 | 500 | 500 |
|---------------|---|---|-----|-----|-----|-----|---|---|-----|-----|-----|-----|
| G3-YSD        | - | + | -   | +   | -   | +   | - | + | -   | +   | -   | +   |

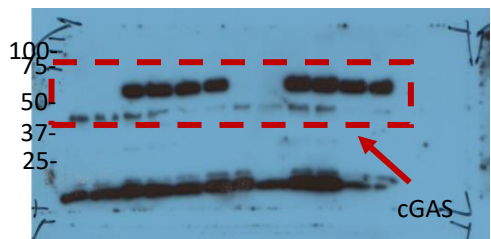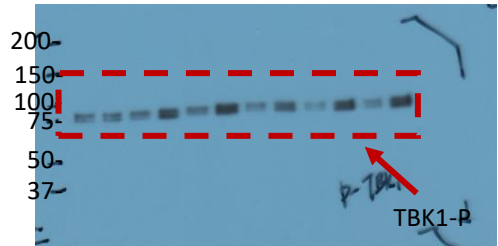

**D**

| cGAS-shRNA (ng) | ○ | ○ | 500 | 500 | 1000 | 1000 |
|-----------------|---|---|-----|-----|------|------|
| G3-YSD          | - | + | -   | +   | -    | +    |

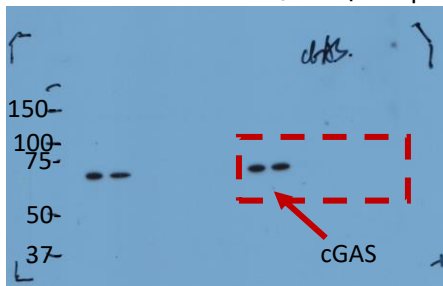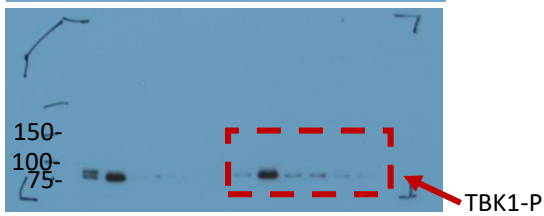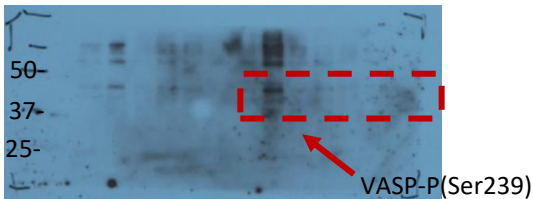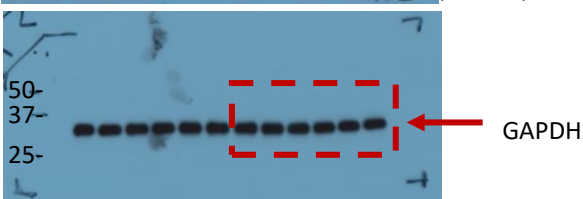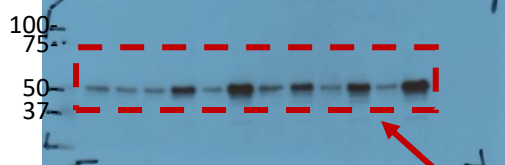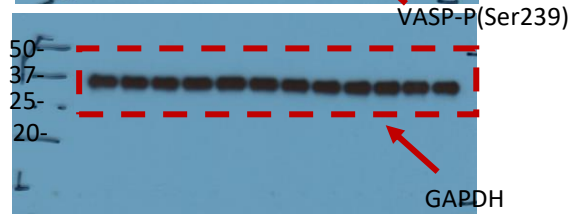

# Full unedited blots for Figure 2

**A**

G3-YSD - - + +  
Rp-br-cGMPS - + - +

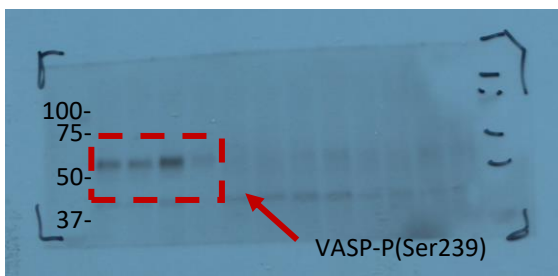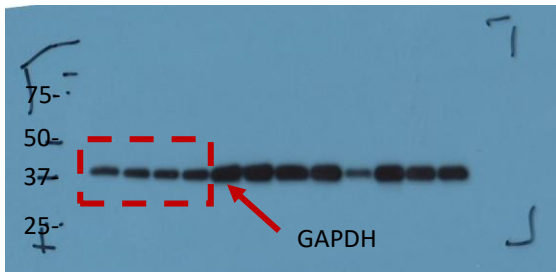

**B**

STING siRNA (nM) 0 5 50 0 5 50  
G3-YSD - - - + + +

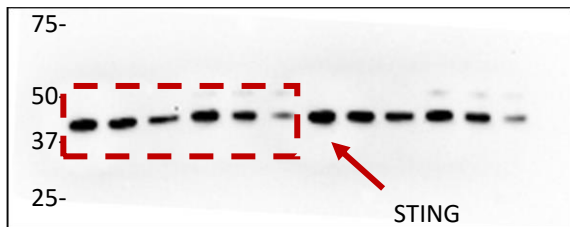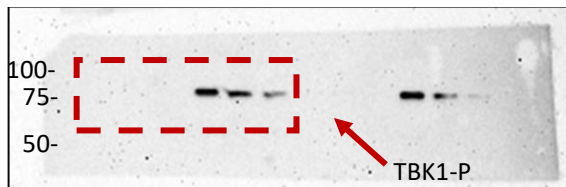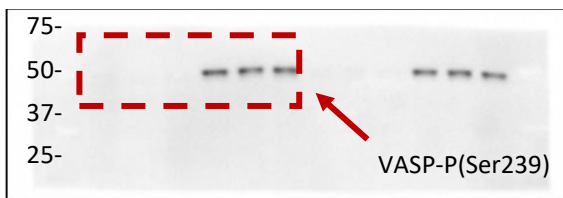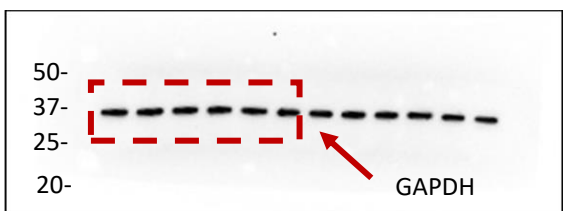

Full unedited blots for Figure 3

**B**

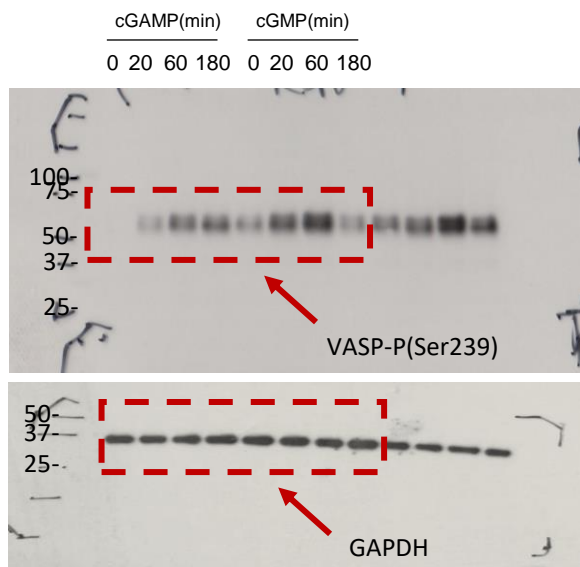

**F**

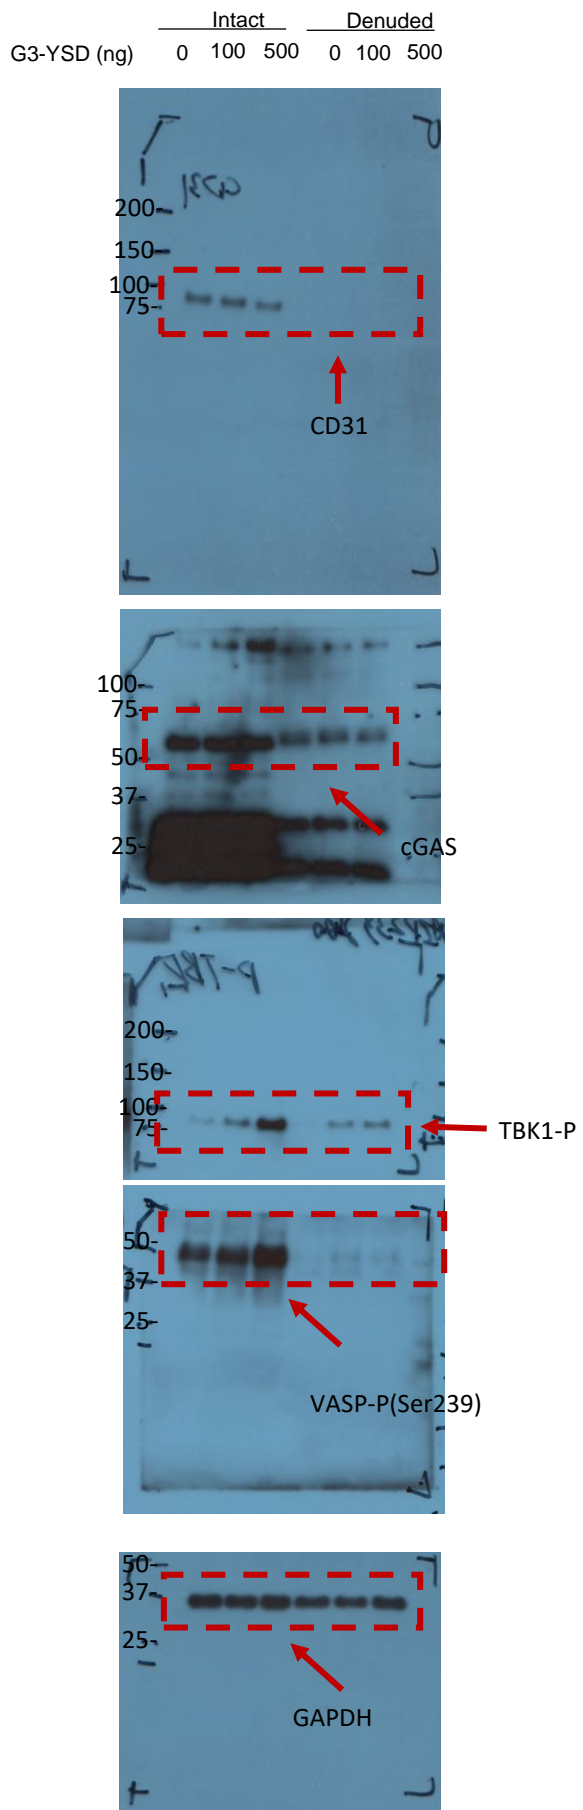

Full unedited blots for Figure 4

**D**  
 G3-YSD (ng) 0 100 500 0 100 500 0 100 500  
 cGAS shRNA (ng) 0 0 0 100 100 100 500 500 100 1000 1000 1000 500

**C**  
 3h 6h 8h 24h  
 G3-YSD (ng) 0 100 500 0 100 500 0 100 500 0 100 500

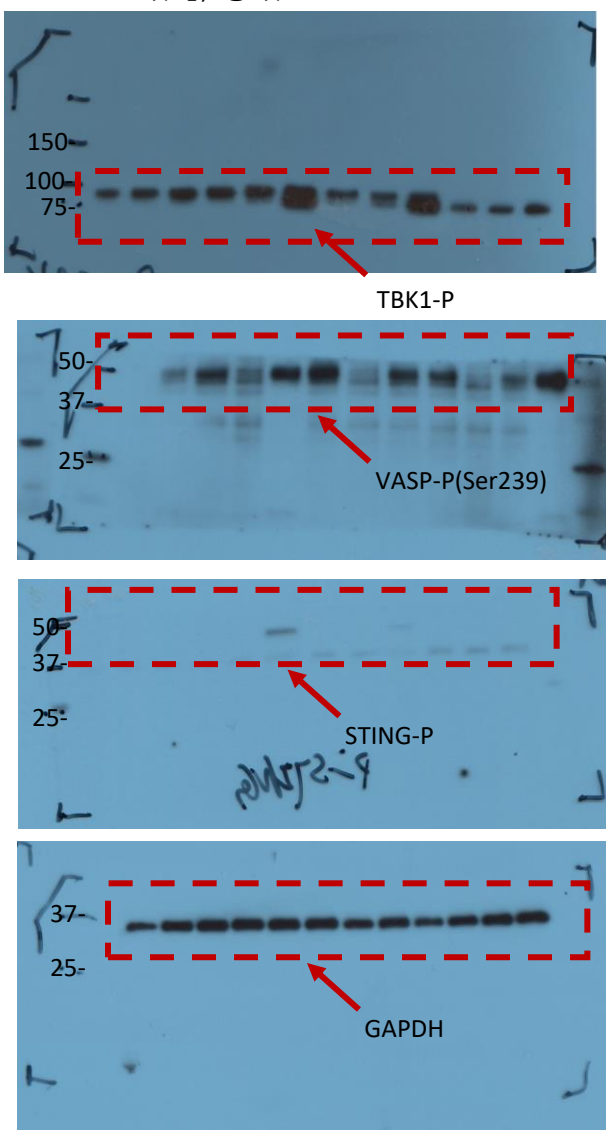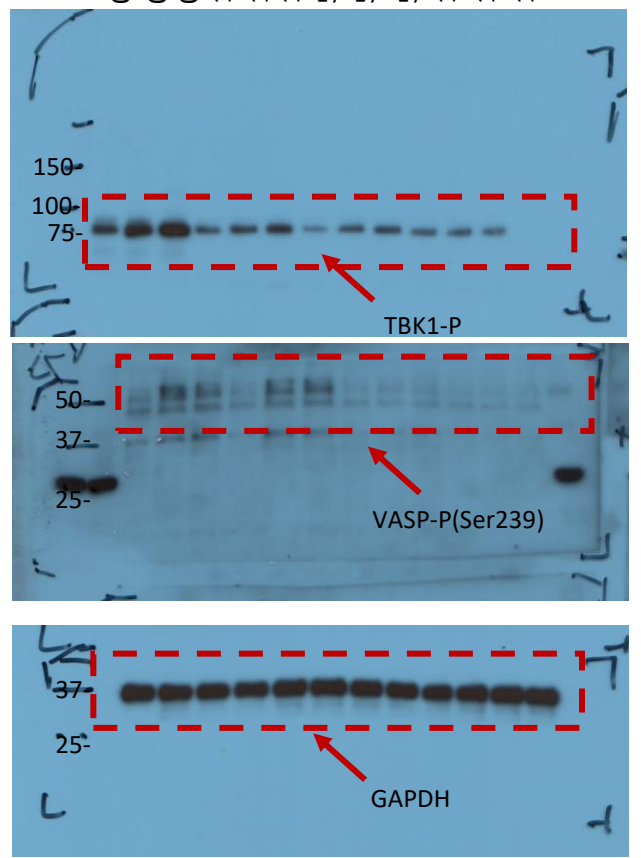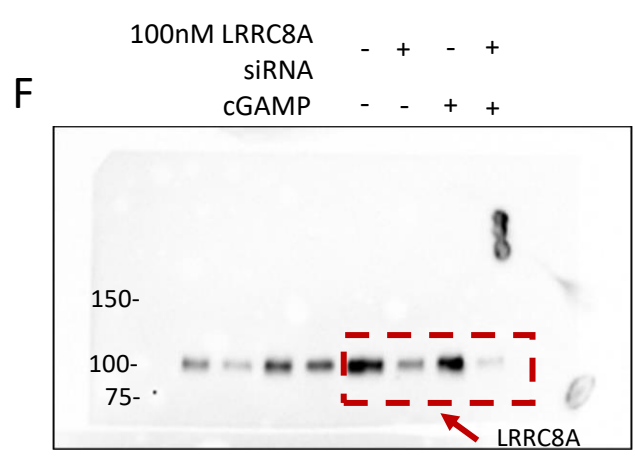

**E**

|                 |           |   |    |   |   |    |           |   |    |   |   |    |
|-----------------|-----------|---|----|---|---|----|-----------|---|----|---|---|----|
| MRP1 siRNA (nM) | 48h siRNA |   |    |   |   |    | 72h siRNA |   |    |   |   |    |
|                 | 0         | 5 | 50 | 0 | 5 | 50 | 0         | 5 | 50 | 0 | 5 | 50 |
| G3-YSD          | -         | - | -  | + | + | +  | -         | - | -  | + | + | +  |

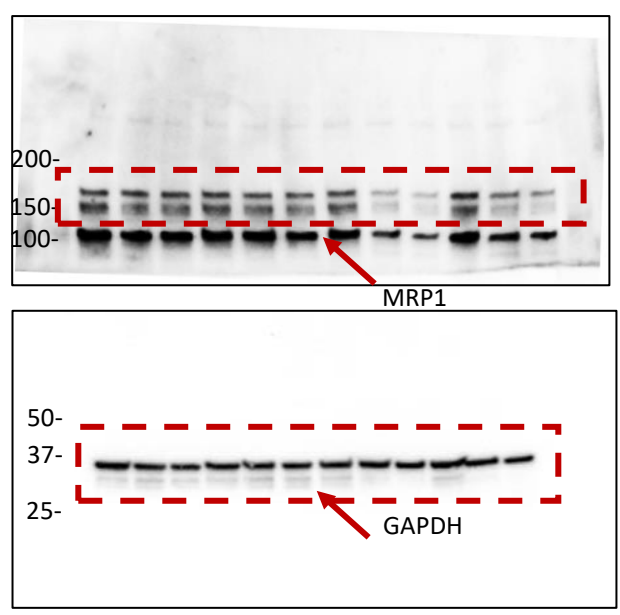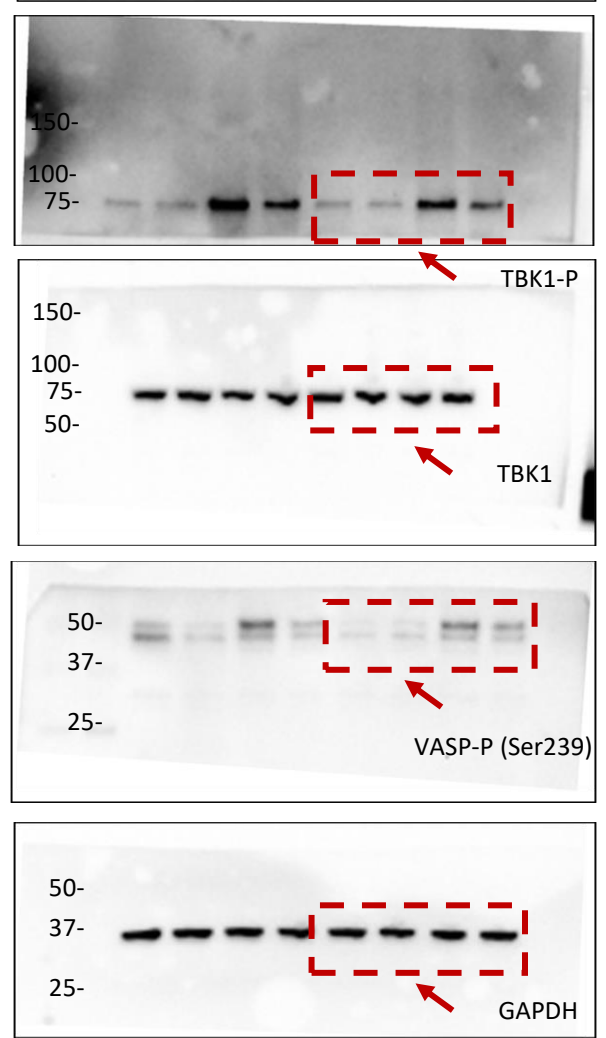

Supplement: cir-148-1023-s002.pdf [file cir-148-1023-s002.pdf]
