# Supplementary material for: Sensing Cytosolic DNA Lowers Blood Pressure by Direct cGAMP-Dependent PKGI Activation
Source: Circulation. 2023 Aug 7;148(13):1023–34. doi: 10.1161/CIRCULATIONAHA.123.065547 (PMC10516174; doi:10.1161/CIRCULATIONAHA.123.065547)
Supplement: Supplementary file 1 [file cir-148-1023-s001.pdf]

## SUPPLEMENTAL MATERIAL

### Supplemental Figures and Figure Legends

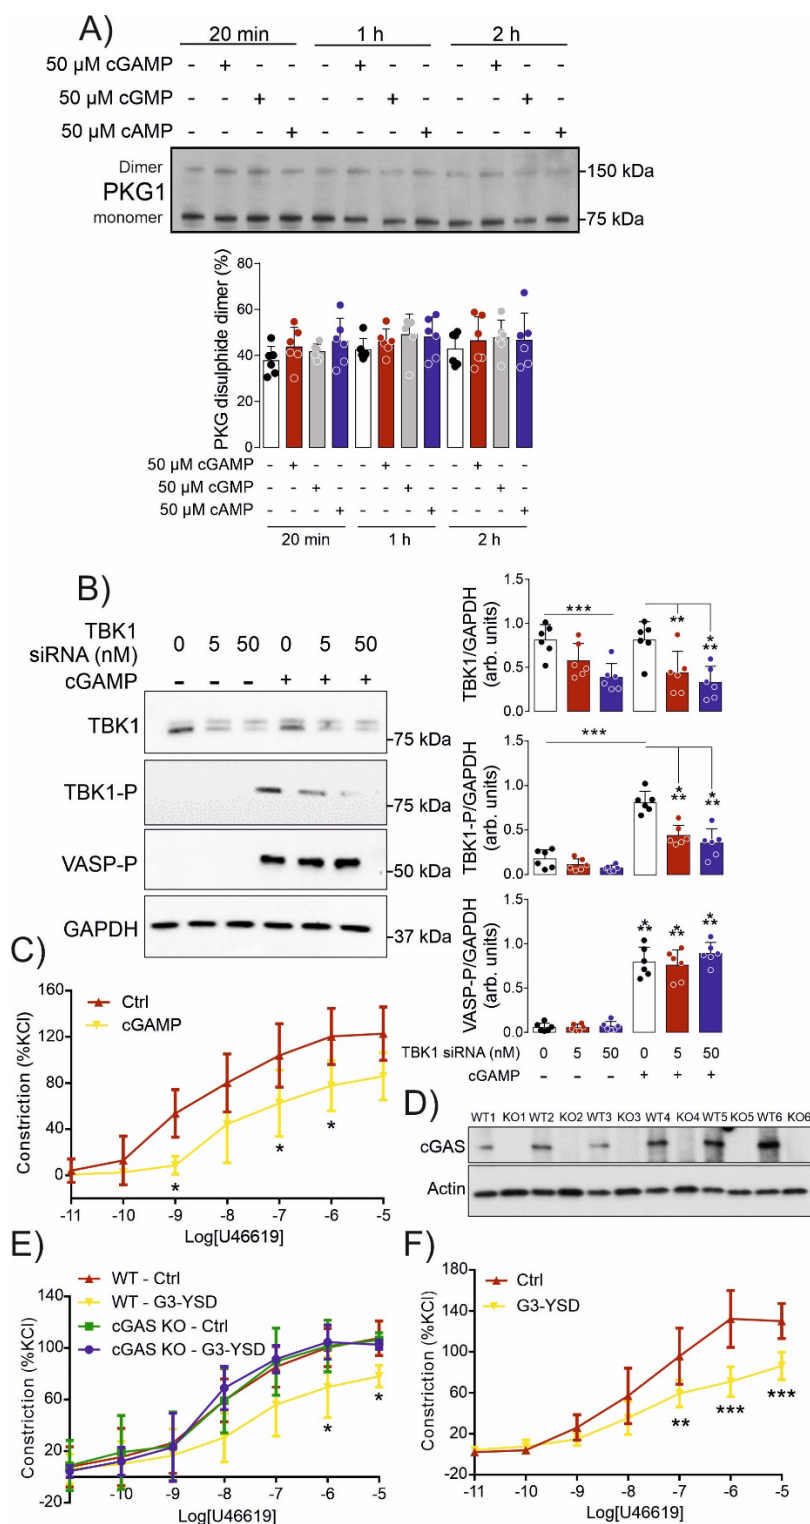

**Fig. S1. cGAS/cGAMP mediates the relaxation of mesenteric vessels.** **a**, Treatment with cGAMP does not impact on PKGI disulphide dimerization (n=6). **b**, VASP Ser239 phosphorylation in cells treated with cGAMP is independent of TBK1 (n=6). **c**, The vasoconstriction of isolated mesenteric vessels to U46619 in the presence or absence of cGAMP (n=5). **d**, Validation of cGAS knock out in thoracic aorta from cGAS<sup>-/-</sup> mice. **e**, The vasoconstriction of isolated mesenteric vessels from WT or cGAS<sup>-/-</sup> littermate mice to U46619 in the presence or absence of G3-YSD (n=5-6). **f**, The vasoconstriction of isolated mesenteric vessels from female mice to U46619 in the presence or absence of G3-YSD (n=5). \*P<0.05; \*\*P<0.01; \*\*\*P<0.005. Comparisons were made using 1-way ANOVA (**a**) or 2-way ANOVA (**b**, **c**, **e**, **f**) followed by the Tukey post hoc test.

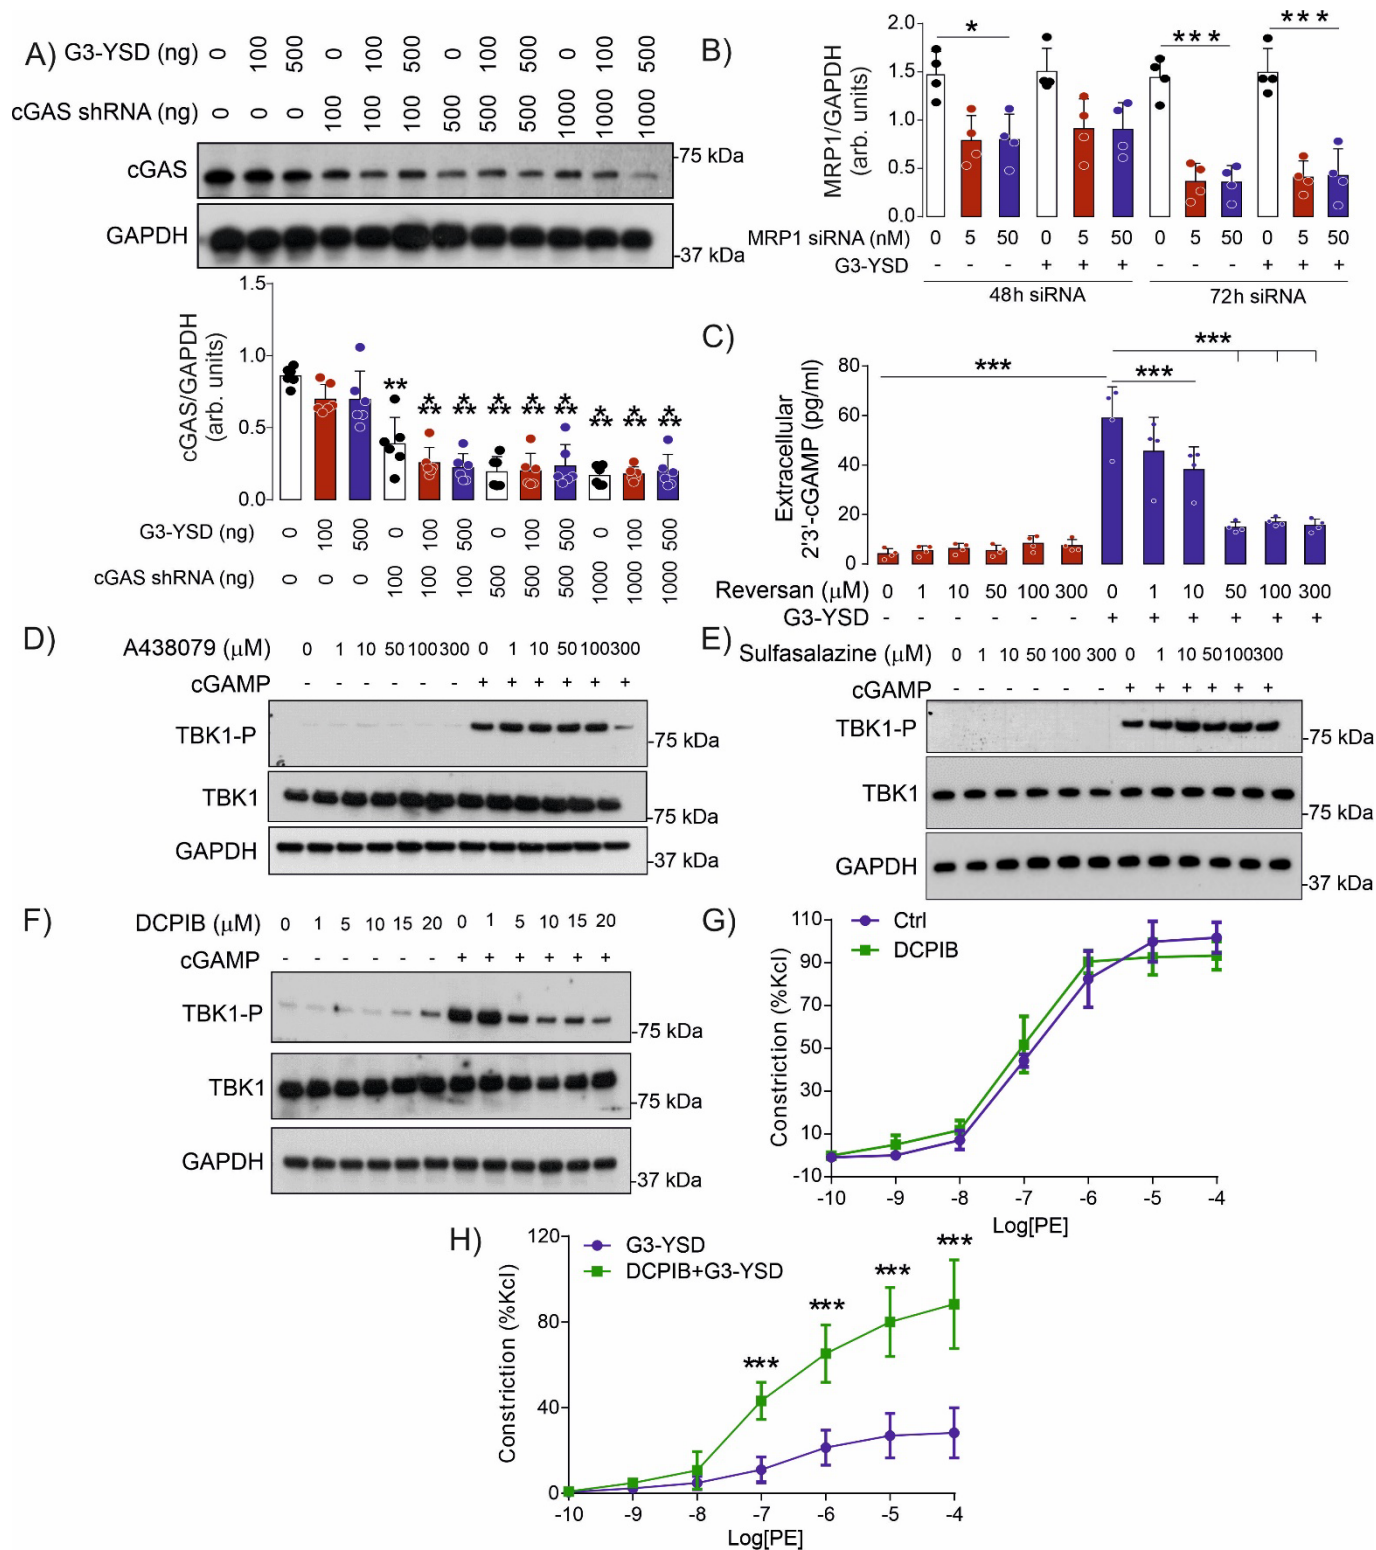

**Fig. S2. cGAS mediates vessel relaxation through VRAC-dependent import of cGAMP.**

**a**, Successful knockdown of cGAS expression in endothelial cells (n=6). **b**, Quantification of MRP1 protein abundance (n=4). **c**, The MRP1 inhibitor reversan prevented release of cGAMP from endothelial cells treated with G3-YSD (n=4). Inhibition of P2X7R by A438079, **d**, or SLC19A1 by sulfasalazine, **e**, does not prevent cGAMP-dependent TBK1 phosphorylation. **f**, The VRAC antagonist DCPIB attenuates cGAMP-dependent TBK1 phosphorylation. **g**, The VRAC inhibitor DCPIB does not impact on phenylephrine dependent constriction of isolated aorta (n=3). **h**, The ability of G3-YSD to limit vasoconstriction to phenylephrine is attenuated in the presence of the VRAC inhibitor DCPIB (n=5). \*P<0.05; \*\*P<0.01; \*\*\*P<0.005. Comparisons were made using 1-way ANOVA (**a**, **b**) or 2-way ANOVA (**c**, **g**, **h**) followed by the Tukey post hoc test.

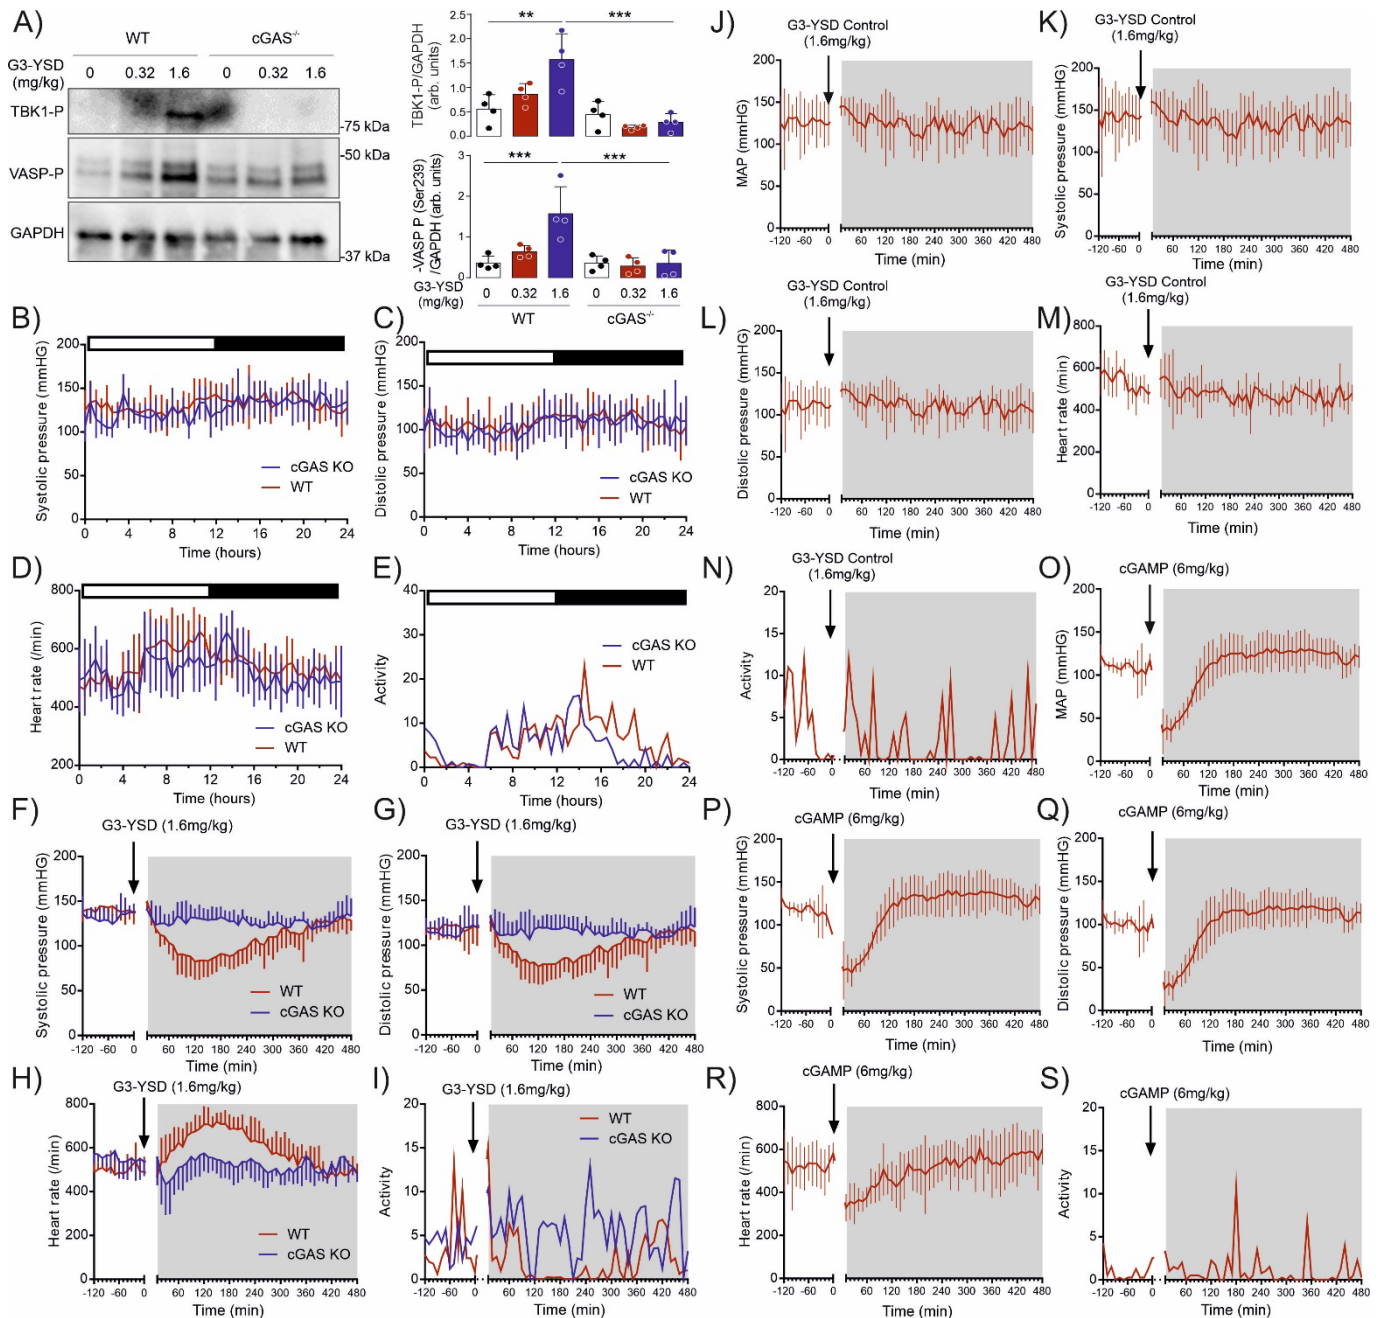

**Fig. S3. cGAS activation or administration with cGAMP induces lowering of blood pressure.** **a**, In vivo administration of G3-YSD led to activation of cGAS and downstream phosphorylation of both TBK1 and VASP in mouse aorta from WT but not cGAS<sup>-/-</sup> mice (n=4). Baseline telemetry measurements in WT and cGAS<sup>-/-</sup> mice for **b**, systolic pressure, **c**, diastolic pressure, **d**, heart rate and **e**, activity. Telemetry measurements after administration of G3-YSD for **f**, systolic pressure, **g**, diastolic pressure, **h**, heart rate and **i**, activity (n=5). Telemetry measurements in mice administered G3-YSD-control for **j**, mean arterial pressure **k**, systolic pressure, **l**, diastolic pressure, **m**, heart rate and **n**, activity (n=3). Telemetry measurements in mice administered cGAMP for **o**, mean arterial pressure **p**, systolic pressure, **q**, diastolic pressure, **r**, heart rate and **s**, activity (n=4). \*\*P<0.01; \*\*\*P<0.005. Comparisons were made using 2-way ANOVA (**a**) followed by the Tukey post hoc test.

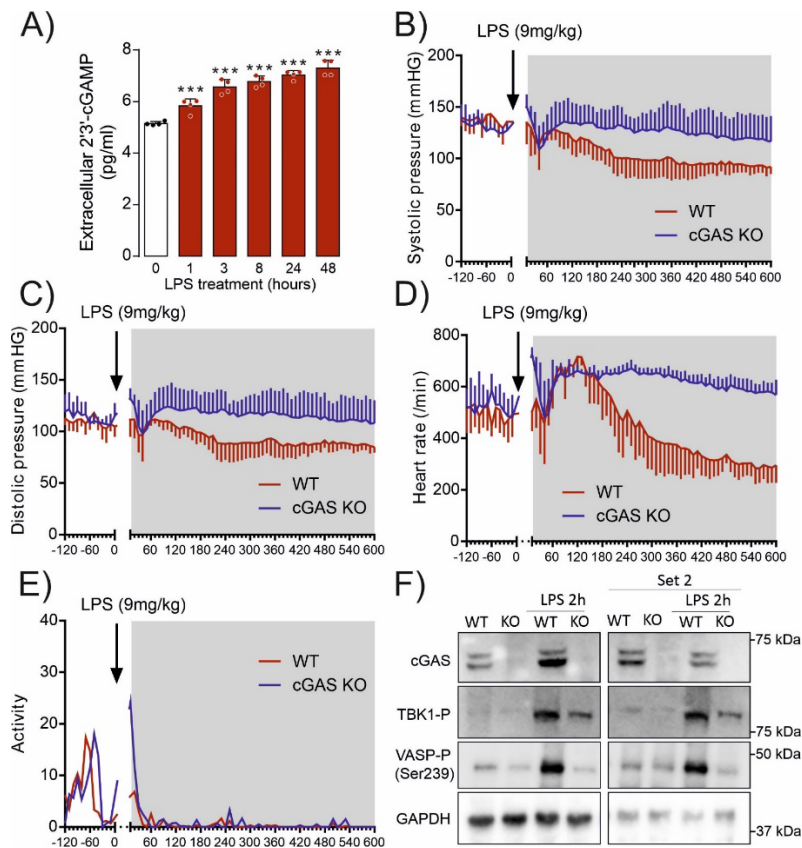

**Fig. S4. Treatment with LPS mediates EC release of cGAMP and lowering of blood pressure.** **a**, Treatment of endothelial cells with LPS leads to a time-dependent accumulation in extracellular cGAMP (n=4). Telemetry measurements in WT and cGAS<sup>-/-</sup> mice after administration of LPS for **b**, systolic pressure, **c**, diastolic pressure, **d**, heart rate and **e**, activity (n=6). **f**, Enhanced phosphorylation of both VASP and TBK1 in the aorta of mice administered LPS is attenuated in cGAS<sup>-/-</sup> mice. \*\*\*P<0.005. Comparisons were made using 1-way ANOVA (**a**) followed by the Tukey post hoc test.
